# Supplementary material
Source: PubMed Central journal article supplement (PMC9117405)
Supplement: NIHMS1761783-supplement-1761783_Sup_material.pdf [file NIHMS1761783-supplement-1761783_Sup_material.pdf]

### Supplemental Table 1

Algorithm for abstraction of clinical adverse outcomes from electronic health records

All outcomes were abstracted from the electronic health record. All clinical notes (physician, nursing, physical and occupational therapy, and respiratory therapy), laboratory values, vitals, and diagnostic procedures were reviewed for descriptors of adverse effects. Dates on which new or worsening adverse effects occurred were recorded.

| Adverse effect   | Descriptors                                                                                                                                                                                                                                                                              |
|------------------|------------------------------------------------------------------------------------------------------------------------------------------------------------------------------------------------------------------------------------------------------------------------------------------|
| Delirium         | “delirium”, “encephalopathy”, “agitation”, “restraints”, “confusion”, “psychosis”, “hallucinations”, “altered mental status”; initiation of the following drugs : “quetiapine”, “ziprasidone”, “Seroquel”, “haloperidol”, “risperidone”                                                  |
| Sedation         | “sedation”, “somnolence”, “drowsiness”, “depressed arousal”; initiation of stimulants : “amantadine”, “ritalin” ; “no eye opening” “does not open eyes” “eyes closed” “opens eyes to sternal rub” “no eye opening to voice” “no eye opening to sternal” number of CT heads or MRI brains |
| rash             | “rash”, “drug rash”                                                                                                                                                                                                                                                                      |
| Hepatotoxicity   | “transaminitis”, “hepatotoxicity”, “liver dysfunction”, “acute liver failure”, “elevated ammonia”, “hyperammonemia”, lab reports with elevated liver enzymes                                                                                                                             |
| Hyponatremia     | “hyponatremia”, “low sodium”, “decreased sodium”, “SIADH”, lab reports with low sodium                                                                                                                                                                                                   |
| Cardiac events   | “hypotension”, “PR prolongation”, “QT prolongation”, “cardiac arrest” “arrhythmias”, “NSTEMI”, “afib”, documented HR < 60, documented BP < 90/60, review of EKGs                                                                                                                         |
| GI events        | “ileus”, “constipation”, “nausea”, “vomiting”, initiation of : “erythromycin”, “reglan”, “ondansetron”, “zofran”, “metoclopramide”.                                                                                                                                                      |
| Blood dyscrasias | “thrombocytopenia”, “neutropenia”, “agranulocytosis”, “leukopenia”, review of lab reports                                                                                                                                                                                                |

**Supplemental Table 2. Outcomes and loss to follow up (90-day mortality)**

|                                                                                | <b>Overall<br/>population<br/>N=94</b> | <b>ASM<br/>prophylaxis<br/>only<br/>N=54</b> | <b>ASM<br/>treatment<br/>continuation<br/>N=40</b> |
|--------------------------------------------------------------------------------|----------------------------------------|----------------------------------------------|----------------------------------------------------|
| <b>Mortality outcome (%)</b>                                                   | 14 (15%)                               | 5 (9%)                                       | 9 (23%)                                            |
| Follow-up, mean (SD), days                                                     | 71 (32)                                | 79 (25)                                      | 61 (38)                                            |
| Follow-up, median (25 <sup>th</sup> , 75 <sup>th</sup> IQR), days              | 90 (51-90)                             | 90 (90-90)                                   | 90 (15 -90)                                        |
| <b>Censoring reasons (%):</b>                                                  |                                        |                                              |                                                    |
| Loss to follow up                                                              | 13 (14%)                               | 6 (11%)                                      | 7 (18%)                                            |
| End of 90-day follow up period                                                 | 67 (72%)                               | 43 (78%)                                     | 24 (60%)                                           |
| Loss to follow-up time, mean (SD) days                                         | 33 (23)                                | 38 (27)                                      | 28 (20)                                            |
| Loss to follow-up time, median (25 <sup>th</sup> , 75 <sup>th</sup> IQR), days | 40 (6-52)                              | 47 (4-56)                                    | 27 (7-51)                                          |

Loss to follow up rate and time were not significantly different between both groups.

**Supplemental Table 3. Outcomes and loss to follow up (90-day functional outcome)**

|                                                                                | <b>Overall<br/>population<br/>N=94</b> | <b>ASM<br/>prophylaxis<br/>only<br/>N=54</b> | <b>ASM<br/>treatment<br/>continuation<br/>N=40</b> |
|--------------------------------------------------------------------------------|----------------------------------------|----------------------------------------------|----------------------------------------------------|
| <b>Good functional outcome (%)</b>                                             | 50 (53%)                               | 38 (70%)                                     | 12 (30%)                                           |
| Follow-up, mean (SD), days                                                     | 33 (30)                                | 24 (24)                                      | 44 (34)                                            |
| Follow-up, median (25 <sup>th</sup> , 75 <sup>th</sup> IQR), days              | 22 (7-52)                              | 14 (6-34)                                    | 42 (9-90)                                          |
| <b>Censoring reasons (%):</b>                                                  |                                        |                                              |                                                    |
| Loss to follow up                                                              | 18 (19%)                               | 9 (17%)                                      | 9 (23%)                                            |
| Mortality                                                                      | 14 (15%)                               | 5 (9%)                                       | 9 (23%)                                            |
| End of 90-day follow up period                                                 | 12 (19%)                               | 2 (4%)                                       | 10 (25%)                                           |
| Loss to follow-up time, mean (SD) days                                         | 33 (23%)                               | 24 (22)                                      | 36 (24)                                            |
| Loss to follow-up time, median (25 <sup>th</sup> , 75 <sup>th</sup> IQR), days | 40 (6-52)                              | 11(9-45)                                     | 40 (11-57)                                         |

Loss to follow up rate and time were not significantly different between both groups.

**Supplemental Table 4. Frequency of clinical adverse outcomes**

|                                                                   | Prophylaxis only<br>N=54 | ASM treatment (low<br>+ intense)<br>N=40 | P value |
|-------------------------------------------------------------------|--------------------------|------------------------------------------|---------|
| Delirium                                                          | 3 (5.5%)                 | 4 (10%)                                  | 0.423   |
| Sedation                                                          | 7 (12.9%)                | 9 (22.5%)                                | 0.237   |
| Cardiac events                                                    | 6 (11.1%)                | 8 (20%)                                  | 0.237   |
| GI events                                                         | 4 (7.4%)                 | 4 (10%)                                  | 0.657   |
| Blood dyscrasia                                                   | 4 (7.4%)                 | 3 (7.5%)                                 | 0.987   |
| Hepatotoxicity                                                    | 7 (12.9%)                | 9 (22.5%)                                | 0.229   |
| Number of head CT<br>scans and MRIs<br>performed, median<br>[IQR] | 1 [0-3]                  | 3 (2-4)                                  | 0.004   |
